# Supplementary material for: Face masks to prevent transmission of respiratory infections: Systematic review and meta-analysis of randomized controlled trials on face mask use
Source: PubMed Central journal article supplement (PMC9714953; doi:10.1371/journal.pone.0271517), 2022-12-01

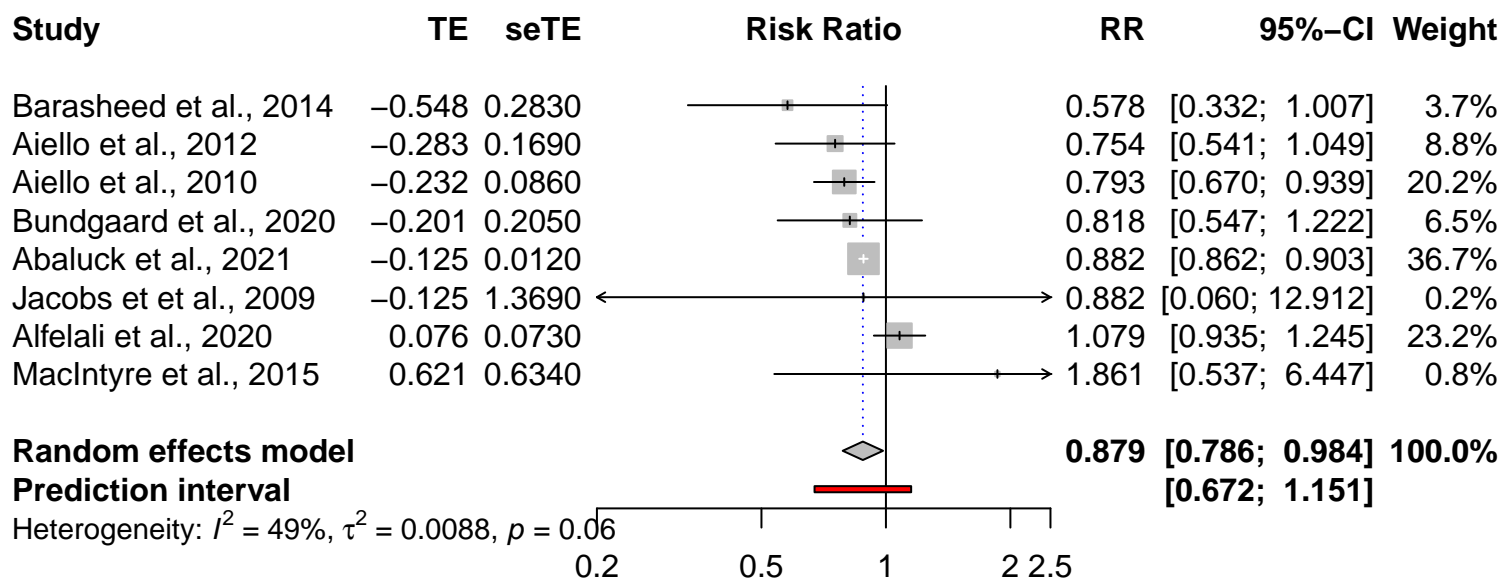

Supplement: pone.0271517.s004.pdf [file pone.0271517.s004.pdf]
